# Supplementary material
Source: PubMed Central journal article supplement (PMC10540526)

# Extended Data Fig.1

**A**

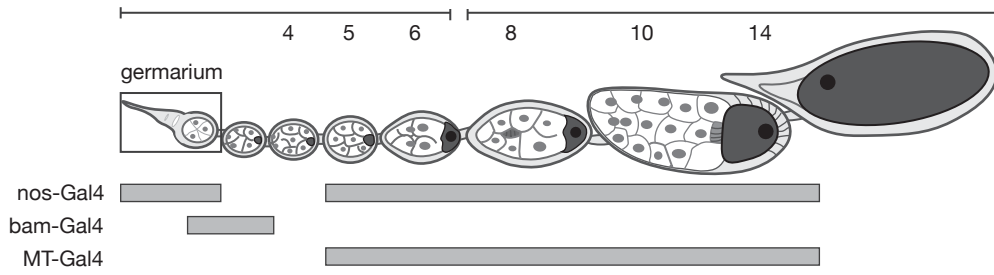

**B**

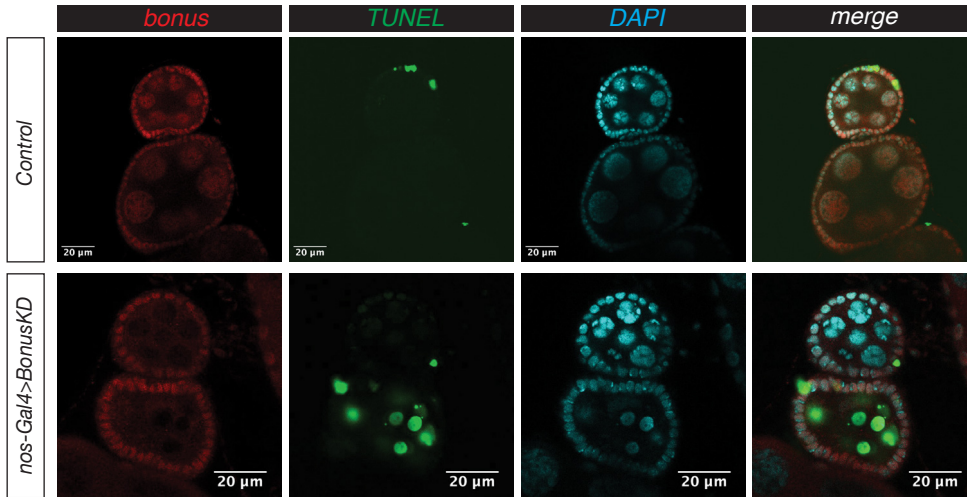

**C**

| Phenotype   | Count    |
|-------------|----------|
| Normal      | 8 (12%)  |
| Hypomorphic | 16 (23%) |
| Rudimentary | 44 (65%) |

**D**

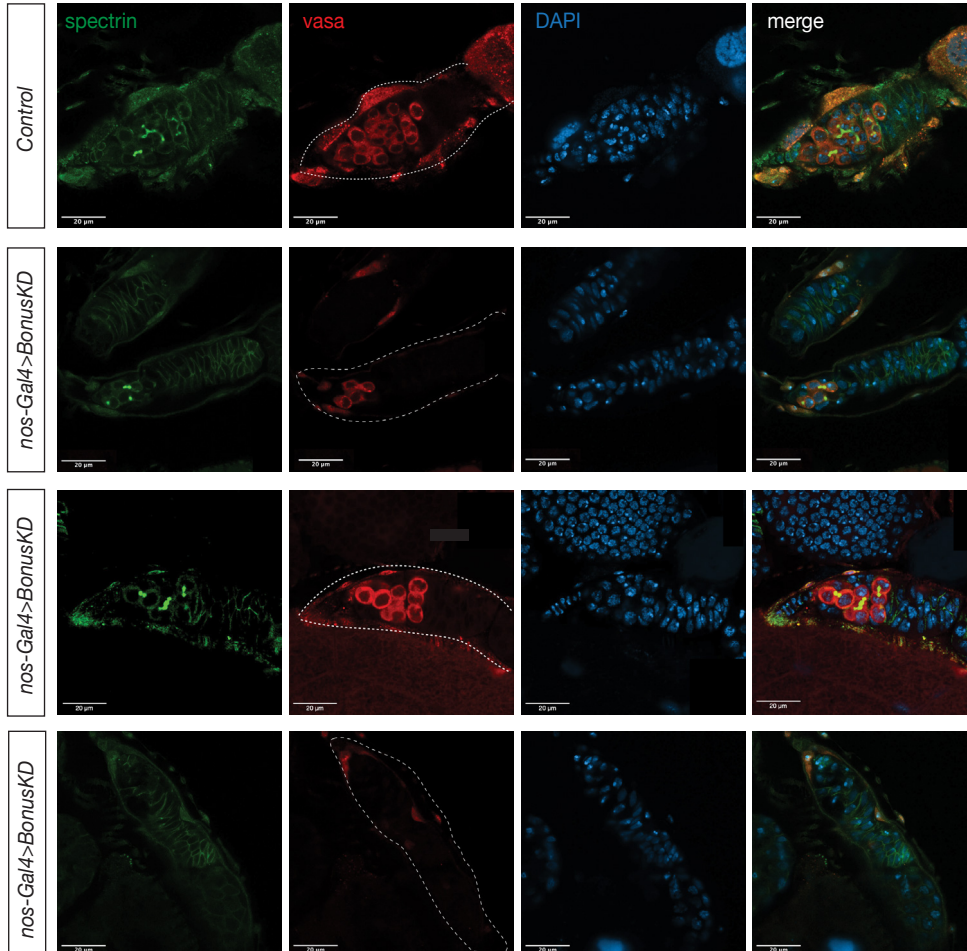

**E**

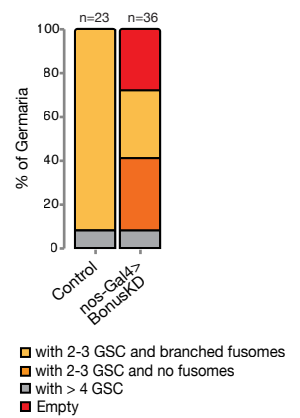

Extended Data Fig.2

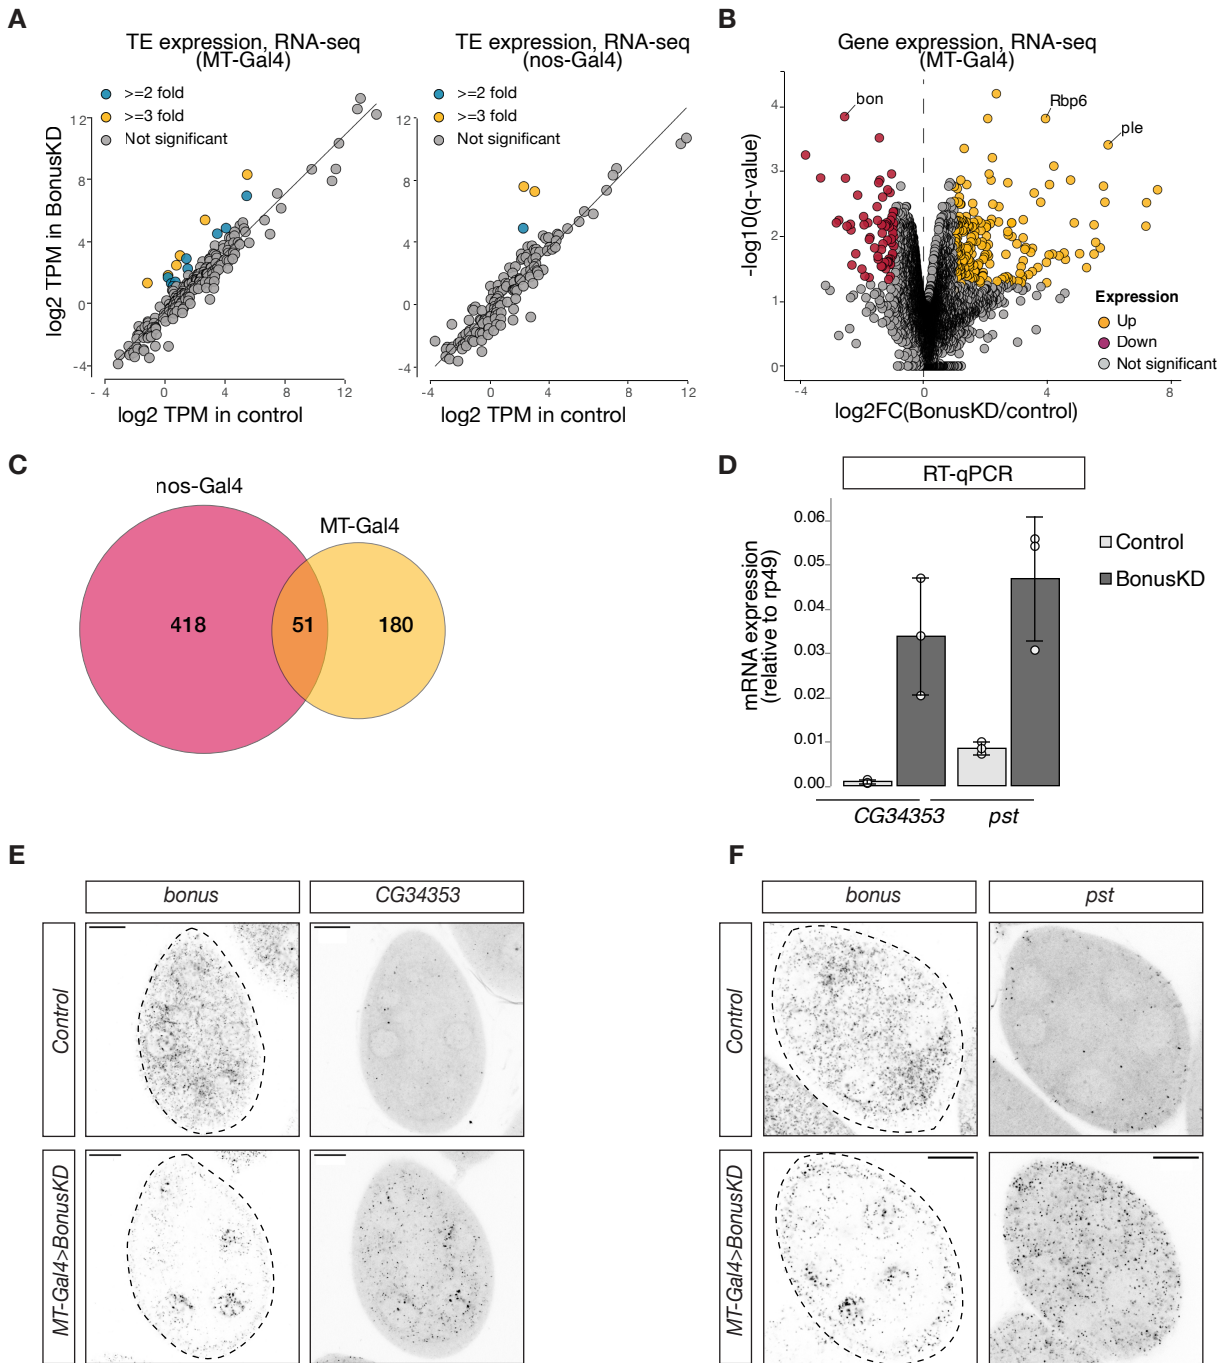

**Extended Data Fig.3**

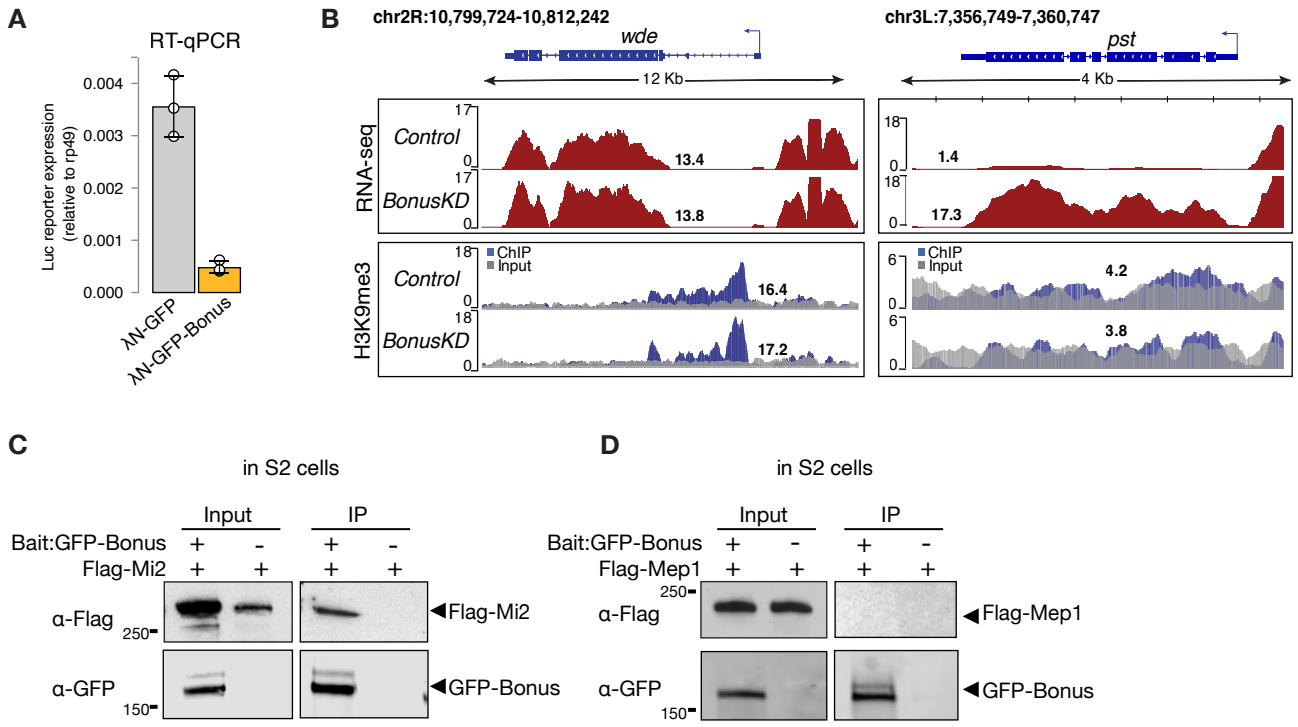

**Extended Data Fig.4**

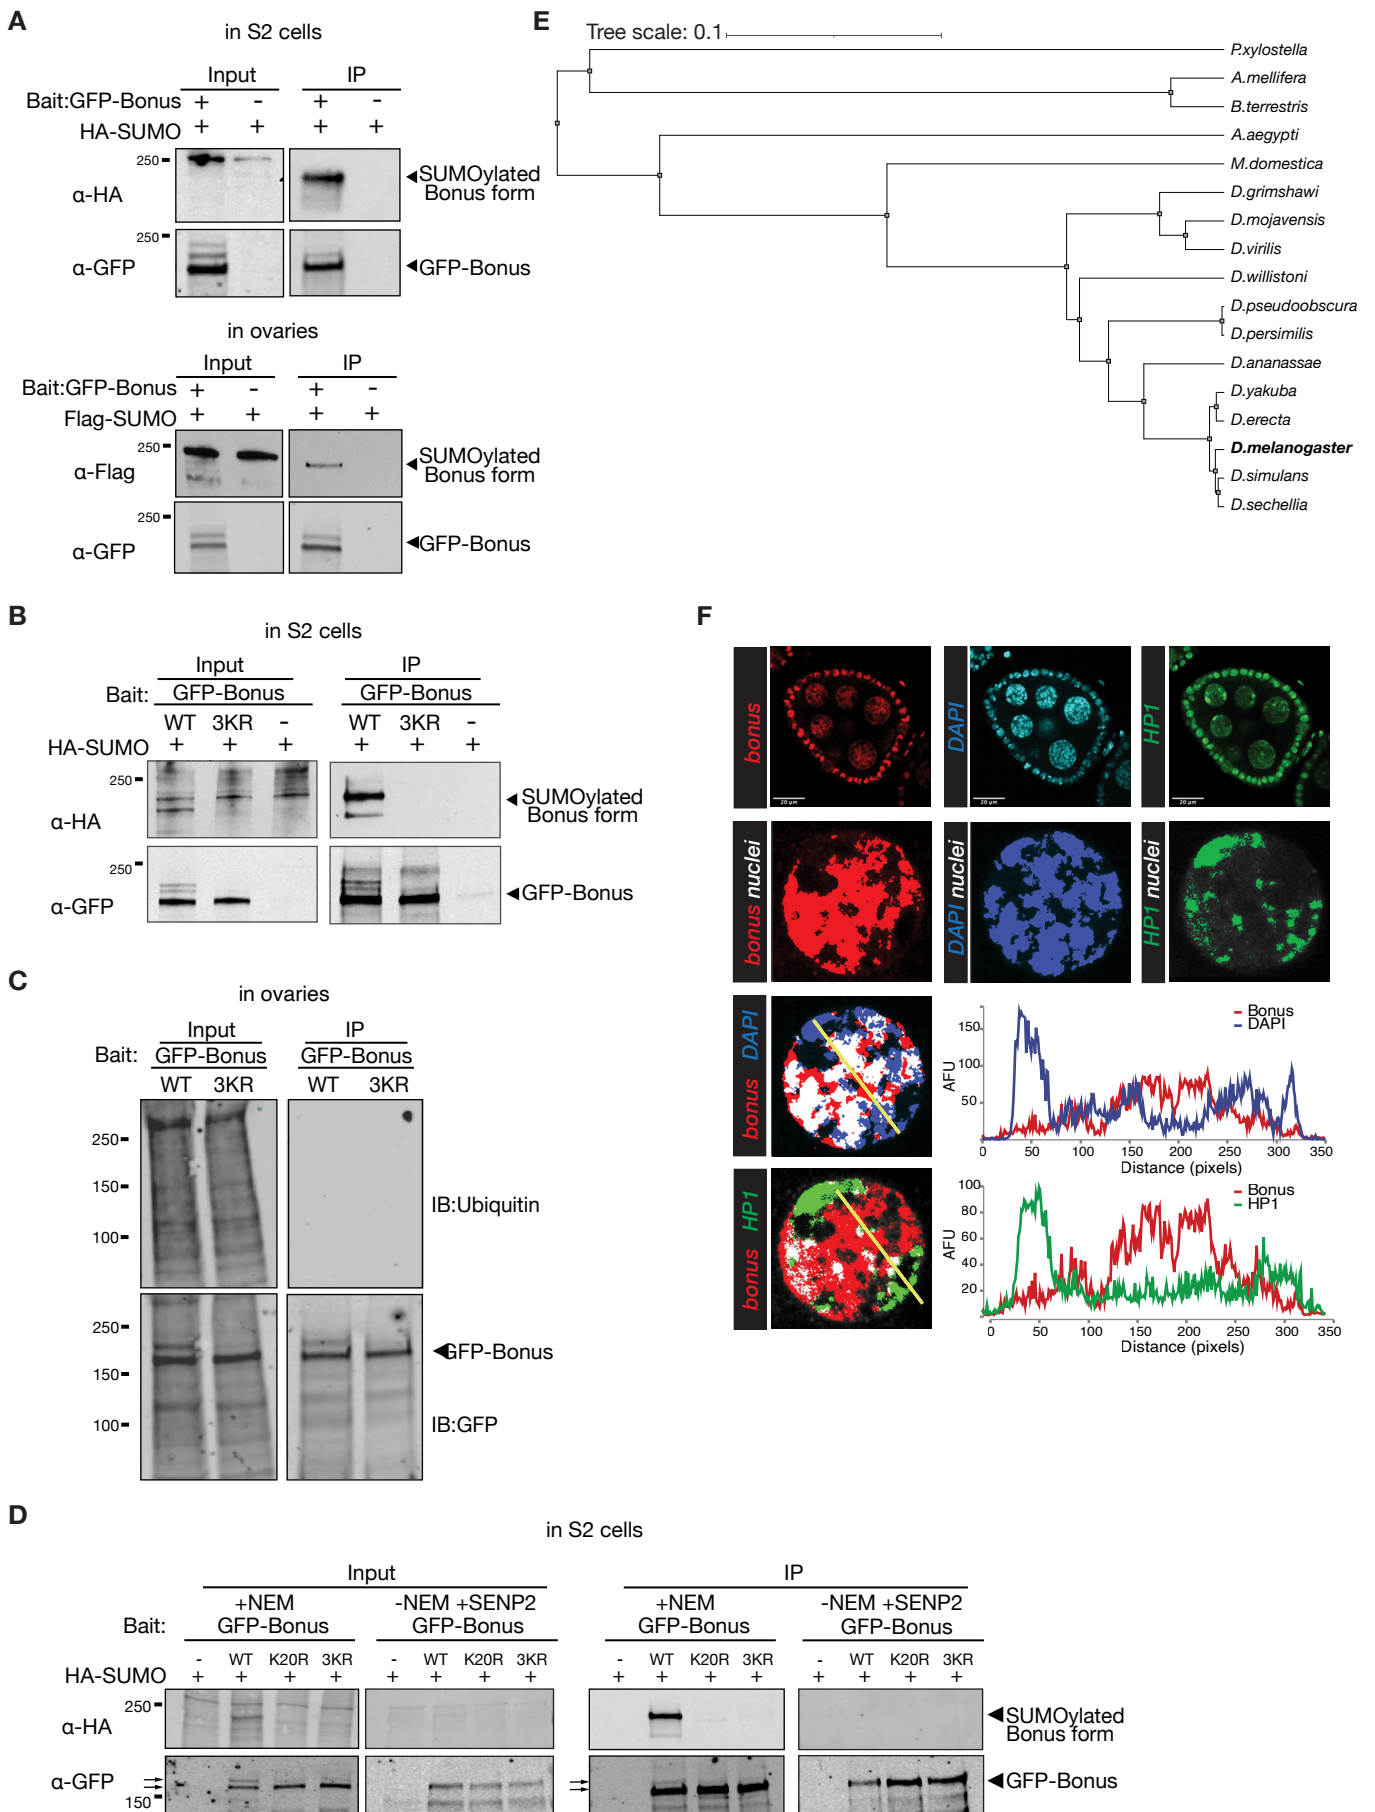

**Extended Data Fig.5**

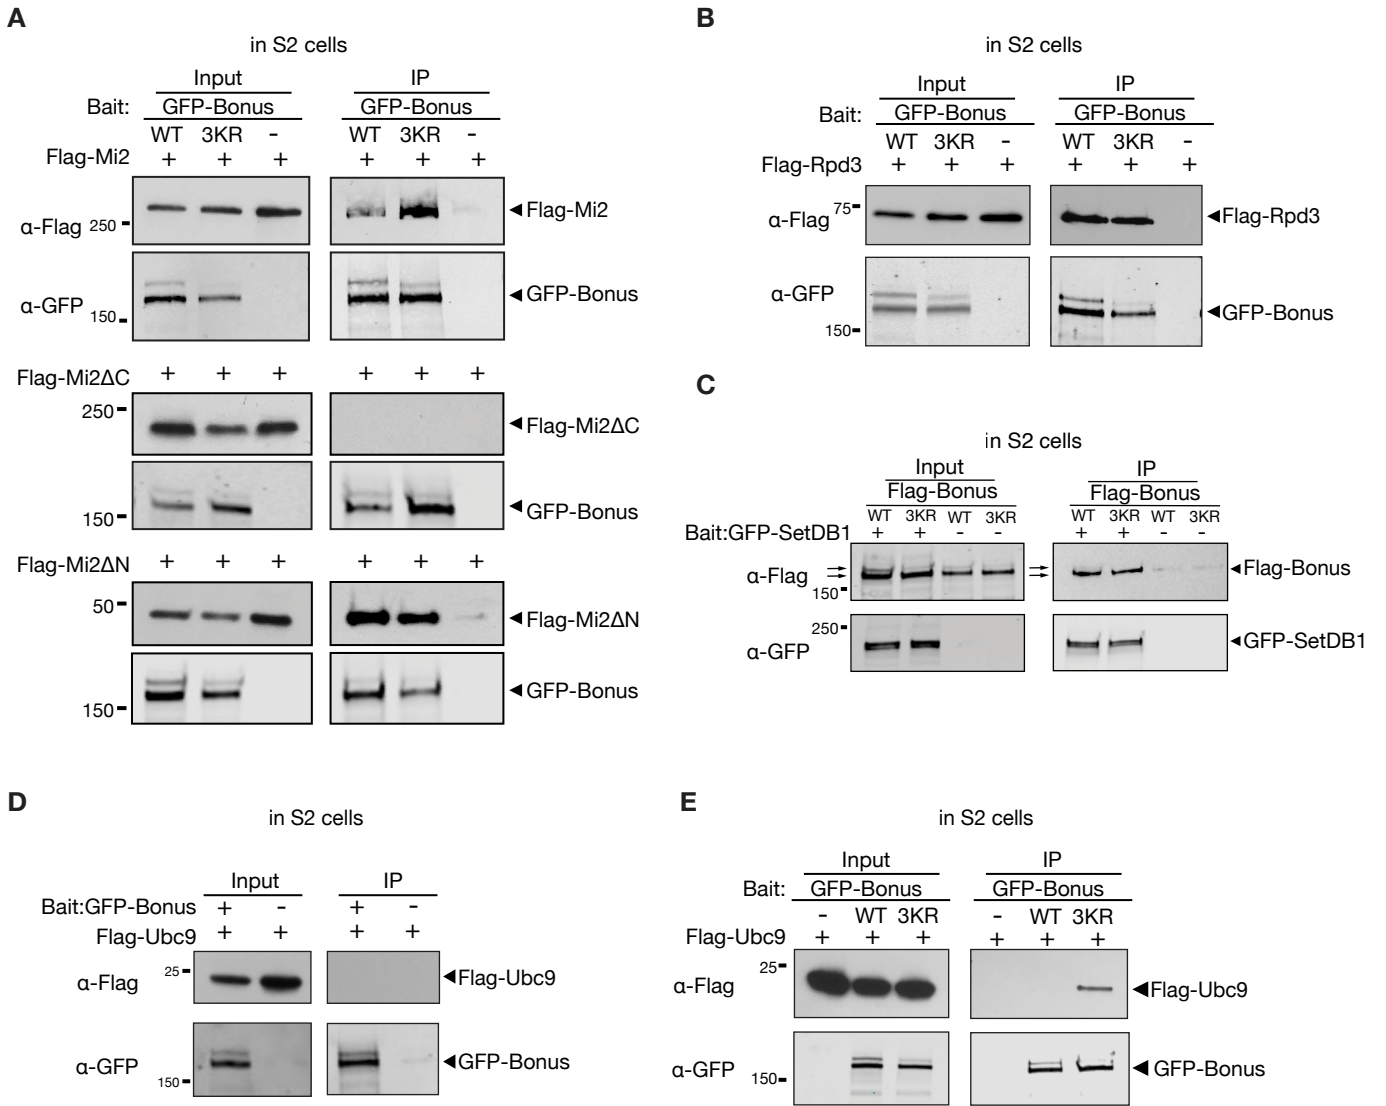

Supplement: media-1.pdf [file media-1.pdf]
